# Supplementary material for: Organic management, reduced tillage, and increased vegetation cover promote ant abundance and diversity in Mediterranean Vineyards
Source: Springer Nature journal article supplement (doi:10.1007/s10841-026-00747-2), 2026-02-01

**Supplementary Materials**

*Organic management, reduced tillage, and increased vegetation cover promote ant abundance and diversity in Mediterranean vineyards*

Enrico Schifani*, Costanza Geppert*, Daniele Giannetti, Gianfranco Anfora, Giovanni Burgio, Serena Giorgia Chiesa, Arturo Cocco, Elena Costi, Ignazio Floris, Francesco Lami, Andrea Lentini, Paolo Lo Bue, Daniela Lupi, Serena Magagnoli, Lara Maistrello, Ezio Peri, Gianvito Ragone, Ivo Rigamonti, Sara Savoldelli, Monica Sofia, Pompeo Suma, Giovanni Tamburini, Lorenzo Marini, Donato A. Grasso

(*) co-first authors

**Table S1:** management practices in each vineyard. Field = vineyard ID, Province = province of the selected vineyards across Italy; Manag. = management (org = organic and con = conventional); Temperature = mean annual temperature (°C); SNH = semi-natural area (%); Tillage = frequency of tillage per year; Mowing = frequency of mowing per year; and TFI = treatment frequency index of pesticide inputs.

| **Field** | **Province** | **Manag.** | **Temperature** | **SNH** | **Tillage** | **Mowing** | **TFI** |
| --- | --- | --- | --- | --- | --- | --- | --- |
| uniba_bio1 | BA | Org | 13.95 | 8 | 3 | 0 | 27.33 |
| uniba_bio2 | BA | Org | 13.73 | 2 | 4 | 0 | 5.41 |
| uniba_con1 | BA | Con | 14.02 | 44 | 6 | 0 | 6.00 |
| uniba_con2 | BA | Con | 13.66 | 7 | NA | 0 | 23.33 |
| unibo_bio1 | RE | Org | 12.56 | 4 | 0 | 4 | 23.33 |
| unibo_bio2 | RE | Org | 13.23 | 0 | 0 | 4 | 48.53 |
| unibo_con1 | RE | Con | 12.69 | 6 | 5 | 0 | 52.00 |
| unibo_con2 | RE | Con | 13.23 | 0 | 0 | 7 | 30.23 |
| unimi_bio1 | SO | Org | 10.30 | 25 | 0 | 3.5 | 4.32 |
| unimi_bio2 | SO | Org | 10.16 | 34 | 0 | 3 | 1.25 |
| unimi_con1 | SO | Con | 10.51 | 17 | 0 | 3 | 38.01 |
| unimi_con2 | SO | Con | 11.34 | 33 | 1 | 3 | 15.40 |
| unimore_bio1 | RE | Org | 12.85 | 37 | 0 | 2 | 18.13 |
| unimore_bio2 | RE | Org | 13.13 | 7 | 0 | 3 | 39.08 |
| unimore_con1 | RE | Con | 12.85 | 23 | 0 | 2.5 | 100.78 |
| unimore_con2 | RE | Con | 13.13 | 4 | 1 | 5 | 14.10 |
| unipa_bio1 | PA | Org | 16.94 | 15 | 2 | 0 | 3.40 |
| unipa_bio2 | PA | Org | 16.90 | 9 | 7 | 1 | 3.60 |
| unipa_con1 | PA | Con | 16.69 | 23 | 2 | 0 | 6.60 |
| unipa_con2 | PA | Con | 16.94 | 10 | 2 | 1 | 8.28 |
| unipd_bio1 | PD | Org | 11.62 | 9 | 0 | 3 | 8.10 |
| unipd_bio2 | PD | Org | 12.79 | 43 | 0 | 3.5 | 44.36 |
| unipd_con1 | PD | Con | 11.66 | 39 | 0 | 4 | 71.69 |
| unipd_con2 | PD | Con | 12.37 | 35 | 0 | 3.5 | 7.84 |
| uniss_bio1 | SS | Org | 13.64 | 50 | 2 | 0 | 0.00 |
| uniss_bio2 | SS | Org | 14.65 | 61 | 0 | 1 | 1.43 |
| uniss_con1 | SS | Con | 13.64 | 50 | 1 | 0 | 3.03 |
| uniss_con2 | SS | Con | 14.64 | 61 | 1 | 0 | 7.33 |
| unitn_bio1 | TN | Org | 10.79 | 17 | 0 | 3 | 1.25 |
| unitn_bio2 | TN | Org | 12.07 | 8 | 0 | 5 | 43.75 |
| unitn_con1 | TN | Con | 10.23 | 17 | 0 | 2 | 32.57 |
| unitn_con2 | TN | Con | 11.99 | 1 | 0 | 4 | 35.29 |

**Table S2: e**ffects of pesticide TFI on ant abundance and ant species richness. Abundance was logarithmically transformed.

| **Response variable** | **Estimate** | **Std. Error** | **t-value** | **p-value** |
| --- | --- | --- | --- | --- |
| Abundance | 0.005 | 0.01 | 0.523 | 0.6072 |
| Species richness | -0.019 | 0.019 | -0.993 | 0.3442 |

**Figure S1:** Schematic representation of the vineyard showing the arrangement of pitfall traps.


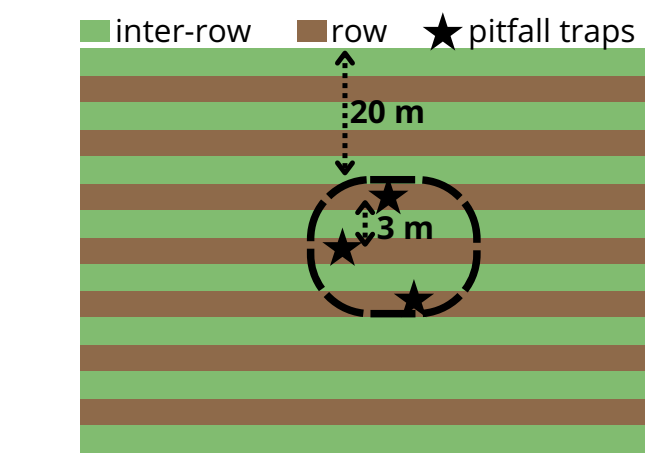

Supplement: MOESM2 [file 10841_2026_747_MOESM2_ESM.docx]
