# Supplementary material for: Organic management, reduced tillage, and increased vegetation cover promote ant abundance and diversity in Mediterranean Vineyards
Source: Springer Nature journal article supplement (doi:10.1007/s10841-026-00747-2), 2026-02-01
Supplement: MOESM1 [file 10841_2026_747_MOESM1_ESM.xlsx]

## Sheet: Sheet1
Field	DSS	Mowing_I	Herbicide	Tilling_I	Green_manure	Mating_disruption	Irrigation	Interrow_width	Mean_production_q_ha	Wine	Fert_N_year_KgL_ha	EI_tot	Fung_TFI	Inse_TFI	Training_systems	DEM_IT	Mean_annual_temp	Mean_annual_rain	Mean_growingseason_rain	Forest_area_ha	Grassland_area_ha	Seminat_area_ha	Vine_area_ha	Shei	Sidi	Patch_density	Slope	Collector	Treatment	Aphaenogaster semipolita	Aphaenogaster spinosa	Camponotus aethiops	Camponotus lateralis	Camponotus nylanderi	Camponotus piceus	Camponotus vagus	Cataglyphis italica	Crematogaster scutellaris	Formica cinerea	Formica clara	Formica cunicularia	Hypoponera eduardi	Lasius emarginatus	Lasius myops	Lasius niger	Lasius paralienus	Messor capitatus	Messor ibericus	Monomorium monomorium
uniba_bio1	1	0	0	3	0	0	0	2	80		0	4953.84	27.3333	0	Spurred_cordon	305	13.9543	637	34.82	6.29	130.987	137.281	37.1231	0.824855	0.692075	36	3.57633	UNIBA	Bio	0	0	0	0	0	0	0	0	2	0	0	0	0	0	0	0	0	7	0	0
uniba_bio2	0	0	0	4	0	0	0	2.37	160		0.114	1583.1	3.91167	1.5	Spurred_cordon	345	13.7282	637	34.82	0	7.4515	7.4515	33.2973	0.715871	0.634271	79	1.60105	UNIBA	Bio	0	0	0	0	1	0	0	0	0	0	0	0	0	0	0	0	0	0	6	0
uniba_con1	0	0	0	6	0	0	1	2.5	120		680	155.72	6	0	Guyot	293	14.0221	637	34.82	9.95	89.5845	99.5359	18.7788	0.632667	0.562757	64	3.94906	UNIBA	Con	0	0	0	0	0	0	0	5	2	0	0	0	0	0	0	0	0	3	0	0
uniba_con2	0	0	0		0	0	1	2.4	130		1050	576.999	23.3333	0	Guyot	357	13.6605	637	34.82	0	7.1103	7.1103	26.9875	0.677783	0.613121	128	0	UNIBA	Con	0	0	0	0	0	0	0	3	1	0	0	0	0	0	0	0	0	0	1	0
unibo_bio1	0	4	0	0	0	0	1	2.8	190		5	1720.74	21.3333	2	Spurred_cordon	139	12.5649	700	51.8	1.38376	0	1.38376	2.07564	0.697901	0.651718	39	1.60105	UNIBO	Bio	0	0	0	0	0	0	1	0	6	0	0	35	0	0	0	7	14	0	1	0
unibo_bio2	0	4	0	0	0	0	0	3			0	1743.46	35.2778	13.25	Spurred_cordon	22	13.226	700	51.8	0	2.3782	2.3782	59.4984	0.702083	0.636857	57	0	UNIBO	Bio	0	0	0	0	0	0	0	0	0	0	0	37	0	0	0	7	10	0	0	0
unibo_con1	0	0	1	5	1	0	1	2.8	200			1461.33	50	1	Spurred_cordon	117	12.6892	700	51.8	9.95	76.6436	86.5957	9.4347	0.878423	0.775082	47	1.13226	UNIBO	Con	0	0	0	0	0	0	0	0	0	0	0	22	5	0	0	10	0	0	0	0
unibo_con2	0	7	0	0	0	1	1	3	200		18	1311.25	28.5648	1.66667	Spurred_cordon	22	13.226	700	51.8	0	0.2057	0.2057	49.2164	0.67987	0.63598	34	0	UNIBO	Con	0	0	0	0	0	0	4	0	22	0	0	56	0	0	0	10	5	0	0	0
unimi_bio1	1	3.5	0	0	0	1	0	0.8	50		36	29.5993	3.32381	1	Guyot	510	10.3022	1294	134	140	27.3	167.3	60.4	0.70356	0.668949		24.4332	UNIMI	Bio	0	0	0	0	0	0	0	0	1	0	0	42	0	6	0	0	0	0	9	1
unimi_bio2	0	3	0	0	0	1	0	1.6	70		12	787.554		1.25	Guyot	535	10.1609	1294	134	120	50	170	61.3	0.801088	0.724733		34.2949	UNIMI	Bio	0	0	0	0	0	0	0	0	0	0	0	24	0	1	0	3	0	0	0	0
unimi_con1	0	3	1	0	0	1	0	1.4	70		13.5	640.962	36.7573	0.25	Cappuccina	474	10.5056	1294	134	133	20.1	153.1	52.2	0.651782	0.671638		23.3434	UNIMI	Con	0	0	19	0	0	0	0	0	0	0	0	2	0	35	0	0	0	0	0	0
unimi_con2	0	3	1	1	0	1	0	1.8	80		24	682.681	14.0036	0.4	Guyot	326	11.3418	1294	134	104	46.3	150.3	62.1	0.813312	0.761609		5.36764	UNIMI	Con	0	0	1	0	0	1	0	0	0	1	0	11	0	0	0	0	3	0	0	0
unimore_bio1	0	2	0	0	0	0	0	2.8	130		0	907.451	18.1256		Double_spurred_cordon	89	12.8475	700	51.8	22	20.9	42.9	40.9	0.636703	0.595169	32	1.82533	UNIMORE	Bio	0	0	0	0	0	0	0	0	4	0	0	34	0	0	0	0	0	0	0	1
unimore_bio2	0	3	0	0	0	1	1	1.4	140			2676.55	32.8333	6.25	Double_spurred_cordon	39	13.1299	700	51.8	11.9	9.58	21.48	84.1	0.610797	0.611611	56	0	UNIMORE	Bio	0	0	0	0	0	0	2	0	23	0	0	18	0	0	0	93	0	0	0	788
unimore_con1	0	2.5	1	0	0	1	1	3	180		99.6667	2713.32	97.9333	1.85	Guyot	88	12.8531	700	51.8	15.3	9.64	24.9	51	0.572	0.505	43	1.60105	UNIMORE	Con	0	0	0	0	0	0	0	0	0	0	0	0	0	0	0	0	74	0	51	0
unimore_con2	0	5	1	1	0	0	1	4.1			211.9	878.24	7.74286	5.35714	Geneva_double_curtain	39	13.1299	700	51.8	9.72	10.1	19.82	75.8	0.581925	0.578725	44	0	UNIMORE	Con	0	0	0	0	0	0	0	0	0	0	0	2	1	0	0	64	0	0	0	0
unipa_bio1	0	0	0	2	1	0	1	2.5	90		60	194.697	3.4	0	Sylvoz	292	16.9434	754	19.52	0	90.1901	90.1901	66.4064	0.884756	0.730757	47	8.6034	UNIPA	Bio	10	0	2	0	2	0	0	0	110	0	0	0	1	0	0	0	0	0	0	0
unipa_bio2	0	1	0	7	1	0	1	2.5	40		0	2792.43	3.6	0	Sylvoz	300	16.8983	754	19.52	0	58.2733	58.2733	136.746	0.825284	0.685929	119	14.772	UNIPA	Bio	28	0	0	0	1	0	0	0	13	0	0	0	0	0	0	0	0	0	0	0
unipa_con1	0	0	0	2	0	0	1	2.5	90		72	1422.47	6.1	0.5	Sylvoz	336	16.6948	754	19.52	0	6.0434	6.0434	69.1175	0.683718	0.60685	25	5.15065	UNIPA	Con	19	0	0	0	0	2	0	0	39	0	0	0	0	0	0	0	0	0	0	0
unipa_con2	0	1	0	2	0	0	0	2.4	40		54	1784.33	8.28235	0	Sylvoz	292	16.9434	754	19.52	0.67	66.7578	67.4245	82.7674	0.817058	0.747501	112	1.13226	UNIPA	Con	1	0	0	0	0	0	0	0	0	0	0	0	0	0	0	0	0	0	0	0
unipd_marini_bio1	0	3	0	0	0	0	0	2.5	65		0	1894.7	8.1	0	Spurred_cordon	224	11.6191	845.8	73.76	194	5.65	199.65	78.3	0.511892	0.467246	56	1.82533	UNIPD	Bio	0	0	1	0	0	0	0	0	0	0	72	10	0	0	0	0	366	0	6	0
unipd_marini_bio2	0	3.5	0	0	0	0	1	2.2	60		1.88	6438.66	38.1111	6.25	Spurred_cordon	17	12.7887	845.8	73.76	108	12.2	120.2	59.8	0.798125	0.71995	44	6.63125	UNIPD	Bio	0	0	0	0	0	0	0	0	0	0	9	17	0	0	0	0	168	0	563	5
unipd_marini_con1	0	4	1	0	0	0	0	2.5			0	9686.6	70.6867		Cappuccina	217	11.6587	845.8	73.76	179	12.4	191.4	85.4	0.573142	0.516572	67	1.82533	UNIPD	Con	0	0	1	0	0	0	0	0	0	0	0	10	0	0	0	0	1	0	61	0
unipd_marini_con2	0	3.5	0	0	0	0	1	2.7	65		27.135	980.824	6.40952	1.42857	Spurred_cordon	91	12.3706	845.8	73.76	102	1.7	103.7	94.5	0.764394	0.707737	48	1.4321	UNIPD	Con	0	0	0	0	0	0	0	0	8	0	0	34	0	0	1	0	111	0	106	2
uniss_bio1	0	0	0	2	0	0	0	1.9	30		0	1681.53		0	Alberello	650	13.6413	801	34.08	141.52	53.5121	195.03	85.5646	0.689972	0.631613	77	5.88513	UNISS	Bio	0	44	0	3	0	0	0	0	0	0	0	0	0	0	0	0	0	0	1	0
uniss_bio2	1	1	0	0	0	0	0	2	25		76.8	75.9042	1.425	0	Alberello	472	14.6471	801	34.08	141.518	53.5121	195.03	85.5646	0.689972	0.631613	55	4.07606	UNISS	Bio	0	78	0	0	0	0	0	0	6	0	0	0	0	0	0	0	0	0	53	0
uniss_con1	0	0	0	1	0	0	0	2	40		0	169.505	3.03333	0	Double_spurred_cordon	650	13.6413	801	34.08	73.47	124.777	198.245	86.4007	0.70598	0.658181	83	18.5719	UNISS	Con	0	0	1	0	0	0	0	0	8	0	0	0	0	0	0	0	0	0	1	0
uniss_con2	0	0	0	1	0	0	0	2	50		0	379.394	7.33333	0	Alberello	473	14.6414	801	34.08	124.84	96.6066	221.442	61.1777	0.669936	0.663615	59	4.34809	UNISS	Con	0	29	0	0	0	0	0	0	0	0	0	0	0	0	0	0	0	0	0	0
unitn_bio1	0	3	0	0	0	1	0	1.5	40		30	2621.56		1.25	Guyot	400	10.7909	945	90.2	181	0	181	93	0.695564	0.639843	110	19.9419	UNITN	Bio	0	0	0	0	0	0	0	0	0	0	0	34	0	0	0	36	0	0	0	0
unitn_bio2	0	5	0	0	0	1	1	2	80		30	2436.51	42.5	1.25	Guyot	173	12.0734	945	90.2	20.1	12.9	33	83	0.468746	0.453828	80	10.527	UNITN	Bio	0	0	0	0	0	0	0	0	0	3	0	27	0	0	0	250	0	0	0	0
unitn_con1	0	2	1	0	0	1	1	1.8	120			1384.5	27.9	3.66667	Guyot	500	10.2259	945	90.2	197	0	197	84	0.856565	0.770449	164	14.4504	UNITN	Con	0	0	0	0	0	0	0	0	0	1	0	8	0	0	0	6	0	0	0	0
unitn_con2	0	4	0	0	0	1	1	3.1	100			1068.29	34.1667	1.125	Guyot	187	11.9944	945	90.2	20	13.1	33.1	97.8	0.522943	0.496508	72	9.25668	UNITN	Con	0	0	0	0	0	0	0	0	0	1	0	7	0	0	0	57	0	0	0	0
[truncated: 34 more columns]
